# Supplementary material for: Structural and Magnetic Analysis of a Family of Structurally Related Iron(III)-Oxo Clusters of Metal Nuclearity Fe8, Fe12Ca4, and Fe12La4
Source: MDPI journal article supplement (doi:10.3390/chemistry5030110), 2023-07-24
Supplement: s1 [file s1]

## SUPPORTING INFORMATION

# Structural and Magnetic Analysis of a Family of Structurally Related Iron(III)-oxo Clusters of Metal Nuclearity Fe<sub>8</sub>, Fe<sub>12</sub>Ca<sub>4</sub>, and Fe<sub>12</sub>La<sub>4</sub>

Alok P. Singh <sup>1</sup>, ChristiAnna L. Brantley <sup>1</sup>, Kenneth Hong Kit Lee <sup>1</sup>, Khalil A. Abboud <sup>1</sup>, Juan E. Peralta <sup>2</sup> and George Christou <sup>1</sup>

<sup>1</sup> Department of Chemistry, University of Florida, Gainesville, FL 32611, USA

<sup>2</sup> Department of Physics and Science of Advanced Materials, Central Michigan University, Mount Pleasant, MI 48859, USA

**Table S1**

Bond valence sums<sup>a</sup> and assignments for the Fe atoms in the asymmetric unit of **1**.

| Atom | Fe <sup>2+</sup> | Fe <sup>3+</sup> |
|------|------------------|------------------|
| Fe1  | 2.89             | <u>3.08</u>      |
| Fe2  | 2.72             | <u>2.91</u>      |
| Fe3  | 2.85             | <u>3.05</u>      |
| Fe4  | 2.75             | <u>2.95</u>      |
| Fe5  | 2.86             | <u>3.05</u>      |
| Fe6  | 2.75             | <u>2.94</u>      |
| Fe7  | 2.88             | <u>3.08</u>      |
| Fe8  | 2.80             | <u>3.00</u>      |

<sup>a</sup> For Fe, the metal oxidation state is the nearest integer to the underlined value, which is the closest to the charge for which it was calculated.

**Table S2**Bond valence sums and assignments for O atoms in the cation of **1**.

| Atom | BVS <sup>a</sup>  | Assignment                     |
|------|-------------------|--------------------------------|
| O1   | 1.86              | O <sup>2-</sup>                |
| O2   | 1.86              | O <sup>2-</sup>                |
| O3   | 1.87              | O <sup>2-</sup>                |
| O4   | 1.91              | O <sup>2-</sup>                |
| O112 | 1.55 <sup>b</sup> | O <sup>2-</sup>                |
| O5   | 0.98              | OH <sup>-</sup>                |
| O6   | 1.00              | OH <sup>-</sup>                |
| O7   | 1.02              | OH <sup>-</sup>                |
| O8   | 0.81              | OH <sup>-</sup>                |
| O111 | 1.24              | OH <sup>-</sup>                |
| O11  | 1.90              | PhPO <sub>2</sub> <sup>-</sup> |
| O12  | 1.88              | PhPO <sub>2</sub> <sup>-</sup> |
| O21  | 1.92              | PhPO <sub>2</sub> <sup>-</sup> |
| O22  | 1.84              | PhPO <sub>2</sub> <sup>-</sup> |
| O31  | 1.93              | PhPO <sub>2</sub> <sup>-</sup> |
| O32  | 1.93              | PhPO <sub>2</sub> <sup>-</sup> |
| O41  | 1.94              | PhPO <sub>2</sub> <sup>-</sup> |
| O42  | 1.89              | PhPO <sub>2</sub> <sup>-</sup> |
| O51  | 1.86              | PhPO <sub>2</sub> <sup>-</sup> |
| O52  | 1.87              | PhPO <sub>2</sub> <sup>-</sup> |
| O61  | 1.91              | PhPO <sub>2</sub> <sup>-</sup> |
| O62  | 1.91              | PhPO <sub>2</sub> <sup>-</sup> |
| O71  | 1.94              | PhPO <sub>2</sub> <sup>-</sup> |
| O72  | 1.94              | PhPO <sub>2</sub> <sup>-</sup> |
| O81  | 1.87              | PhPO <sub>2</sub> <sup>-</sup> |
| O82  | 1.93              | PhPO <sub>2</sub> <sup>-</sup> |
| O91  | 1.92              | PhPO <sub>2</sub> <sup>-</sup> |
| O92  | 1.89              | PhPO <sub>2</sub> <sup>-</sup> |
| O101 | 1.89              | PhPO <sub>2</sub> <sup>-</sup> |
| O102 | 1.89              | PhPO <sub>2</sub> <sup>-</sup> |

<sup>a</sup> Non-, singly-, and doubly-protonated O atoms have BVS values of ~1.8 to 2.0, ~1.0 to 1.2, and ~0.2 to 0.4, although H-bonding can affect the ranges. <sup>b</sup> Decreased from a typical O<sup>2-</sup> value due to hydrogen-bonding with the NHEt<sub>3</sub><sup>+</sup> cation.

**Table S3**Bond valence sums<sup>a</sup> and assignments for the Fe and O atoms in the asymmetric unit of **2**.

| Atom | Fe <sup>2+</sup> | Fe <sup>3+</sup>              |
|------|------------------|-------------------------------|
| Fe1  | 2.54             | <u>3.03</u>                   |
| Fe2  | 2.67             | <u>3.18</u>                   |
| Fe3  | 2.67             | <u>3.18</u>                   |
| Fe4  | 2.56             | <u>2.05</u>                   |
| Fe5  | 2.62             | <u>3.1</u>                    |
| Fe6  | 2.60             | <u>2.96</u>                   |
| Atom | BVS              | Assignment                    |
| O1   | 1.94             | O <sup>2-</sup>               |
| O2   | 1.92             | O <sup>2-</sup>               |
| O3   | 1.96             | O <sup>2-</sup>               |
| O4   | 1.99             | O <sup>2-</sup>               |
| O5   | 2.06             | RO <sup>-</sup>               |
| O6   | 1.96             | O <sup>2-</sup>               |
| O7   | 1.94             | RO <sup>-</sup>               |
| O14  | 2.12             | RCO <sub>2</sub> <sup>-</sup> |
| O16  | 2.10             | RCO <sub>2</sub> <sup>-</sup> |
| O23  | 2.16             | RCO <sub>2</sub> <sup>-</sup> |
| O25  | 2.11             | RCO <sub>2</sub> <sup>-</sup> |

<sup>a</sup> For Fe, the metal oxidation state is the nearest integer to the underlined value, which is the closest to the charge for which it was calculated. For O, values in the ~1.8–2.0, ~1.0–1.2, and ~0.2–0.4 indicate non-, single-, and double-protonation, respectively.

**Table S4**Bond valence sums<sup>a</sup> and assignments for the Fe and O atoms in the asymmetric unit of **3**.

| Atom | Fe <sup>2+</sup> | Fe <sup>3+</sup> |
|------|------------------|------------------|
| Fe1  | 2.78             | <u>2.97</u>      |
| Fe2  | 2.79             | <u>2.99</u>      |
| Fe3  | 2.73             | <u>2.92</u>      |
| Fe4  | 2.73             | <u>2.92</u>      |
| Fe5  | 2.67             | <u>2.86</u>      |
| Fe6  | 2.74             | <u>2.94</u>      |
| Atom | BVS              | Assignment       |
| O1   | 1.72             | O <sup>2-</sup>  |
| O2   | 1.73             | O <sup>2-</sup>  |
| O3   | 1.83             | O <sup>2-</sup>  |
| O4   | 2.07             | O <sup>2-</sup>  |
| O5   | 1.14             | OH <sup>-</sup>  |
| O6   | 2.01             | O <sup>2-</sup>  |
| O7   | 1.15             | OH <sup>-</sup>  |

<sup>a</sup> For Fe, the metal oxidation state is the nearest integer to the underlined value, which is the closest to the charge for which it was calculated. For O, values in the ~1.8–2.0, ~1.0–1.2, and ~0.2–0.4 indicate non-, single-, and double-protonation, respectively.

**Table S5**RMSD calculations for **1** with **2**.

| Complex <b>1</b> | Complex <b>2</b> | Deviation (Å) |
|------------------|------------------|---------------|
| Fe3              | Fe3              | 0.012         |
| Fe2              | Fe5              | 0.060         |
| Fe4              | Fe4              | 0.071         |
| Fe1              | Fe2              | 0.148         |
| Fe5              | Fe3              | 0.096         |
| Fe6              | Fe5              | 0.083         |
| Fe8              | Fe5              | 0.083         |
| Fe7              | Fe2              | 0.177         |
|                  | Total            | 0.109         |

**Table S6**RMSD calculations for **1** with **3**.

| Complex <b>1</b> | Complex <b>2</b> | Deviation (Å) |
|------------------|------------------|---------------|
| Fe8              | Fe2              | 0.047         |
| Fe6              | Fe3              | 0.133         |
| Fe5              | Fe4              | 0.070         |
| Fe1              | Fe1              | 0.086         |
| Fe7              | Fe1              | 0.127         |
| Fe3              | Fe4              | 0.103         |
| Fe2              | Fe2              | 0.075         |
| Fe4              | Fe3              | 0.100         |
|                  | Total            | 0.096         |

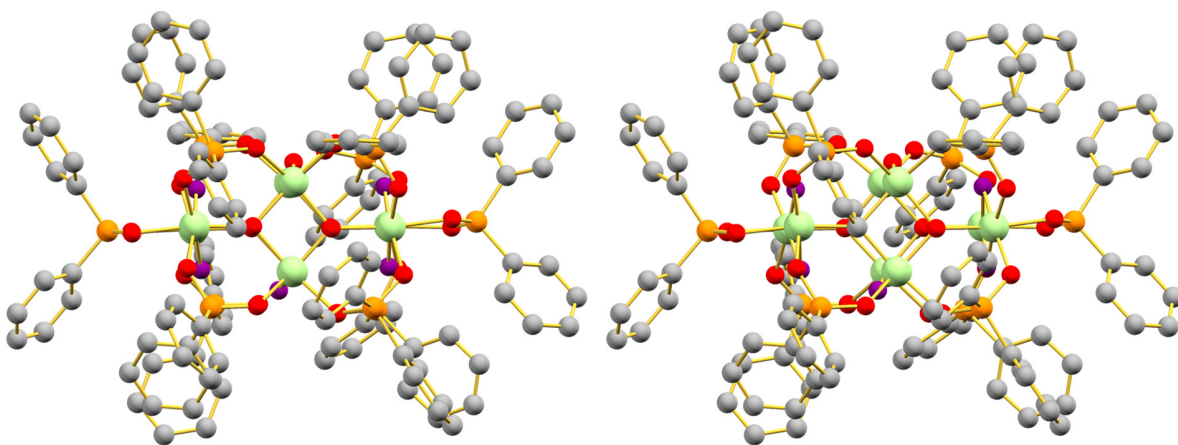

**Figure S1.** Stereopair of the complete anion of **1**. Color code:  $\text{Fe}^{3+}$  light green, O red, P orange, C gray (H atoms omitted for clarity).

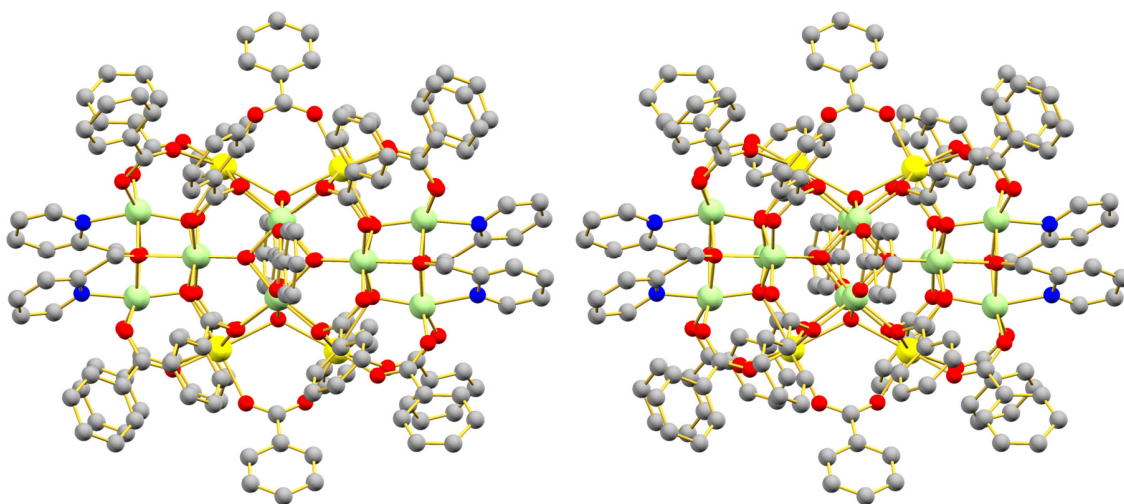

**Figure S2.** Stereopair of complex **2**. Color code:  $\text{Fe}^{3+}$  light green,  $\text{Ca}^{2+}$  yellow, O red, N blue, C gray (H atoms omitted for clarity).

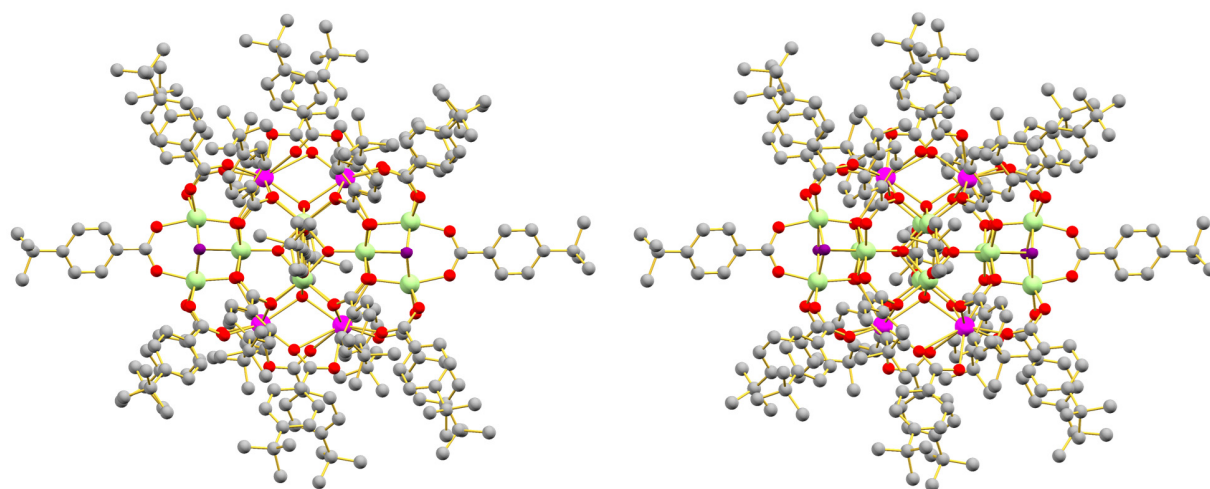

**Figure S3.** Stereopair of complex **3**. Color code: Fe<sup>3+</sup> light green, La<sup>3+</sup> magenta, O red, OH<sup>-</sup> purple, C gray (H atoms omitted for clarity).

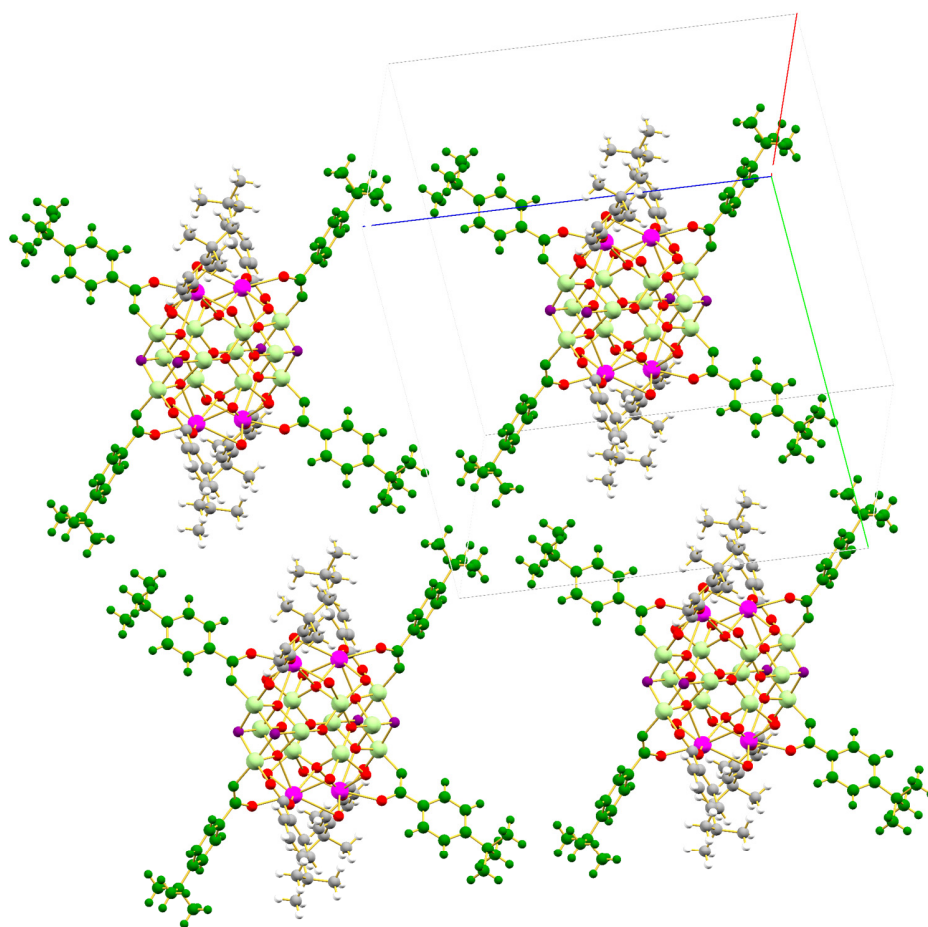

**Figure S4.** Expanded version of Figure 10 showing the near-perpendicular alignment of 4-<sup>t</sup>Bu-benzoate ligands for four molecules of **3**. The *a* axis is the red line, *b* axis is the lime green line, and the *c* axis is the blue line. Color code: Fe<sup>3+</sup> light green, La<sup>3+</sup> magenta, O red, OH<sup>-</sup> purple, C gray (some C and H atoms are omitted for clarity).

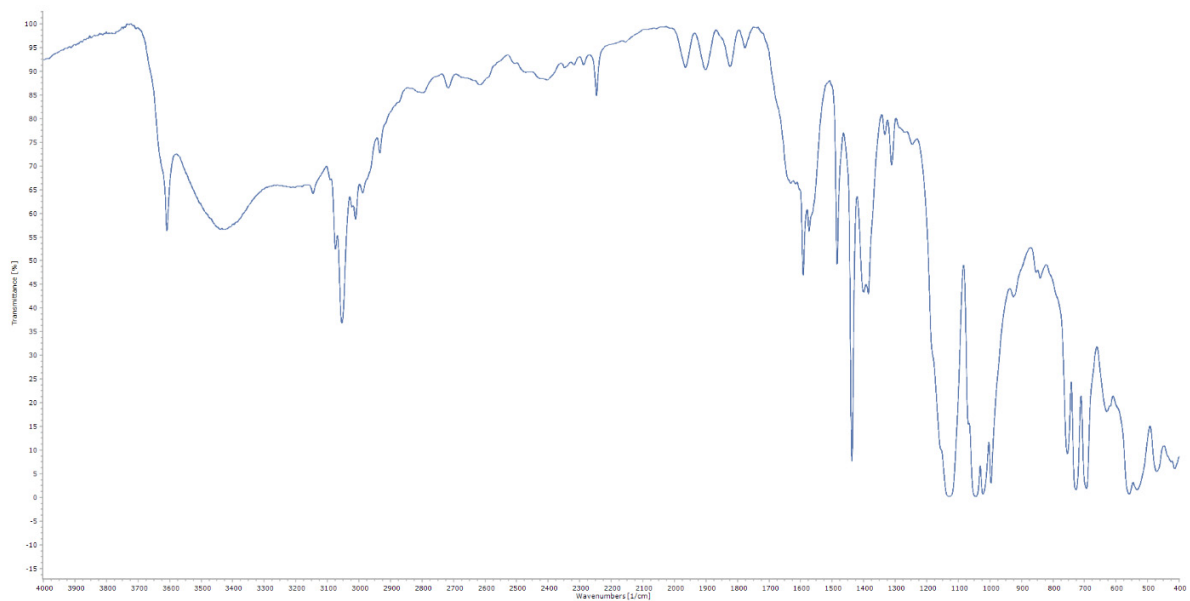

**Figure S5.** Infrared spectrum of **1**.

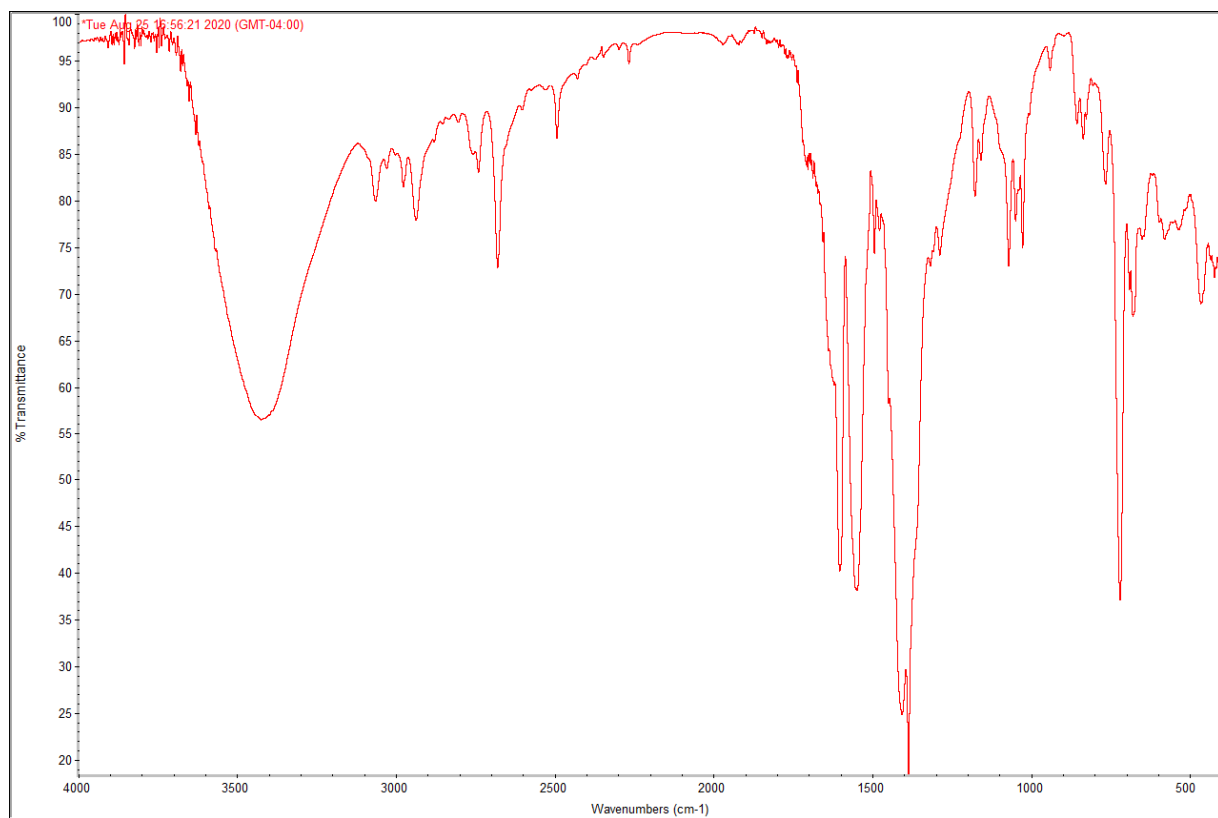

**Figure S6.** Infrared spectrum of **2**.



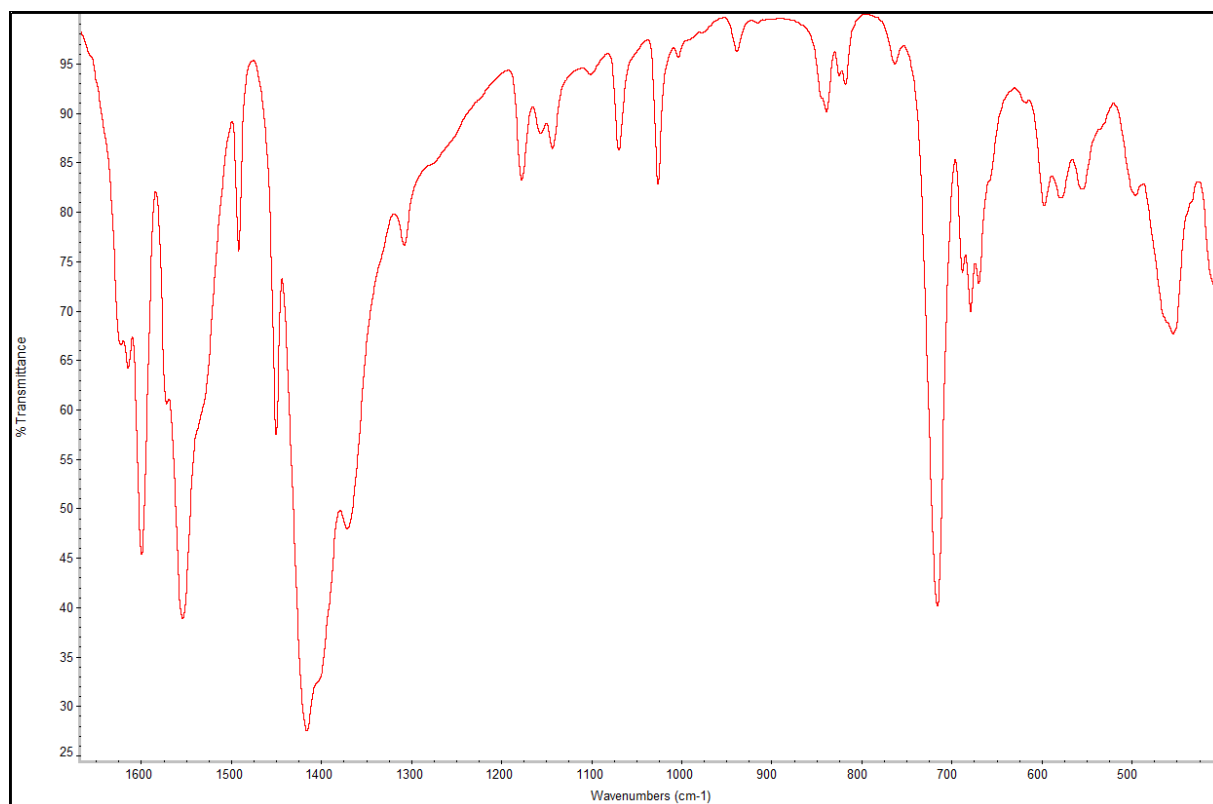

**Figure S7.** Infrared spectrum of **3**.
